# Supplementary material
Source: Springer Nature journal article supplement (https://www.springermedizin.de/resource/supplementary/12887_2007_182_MOESM3_ESM.pdf/9477560)

INCIDENCE OF ACUTE SEIZURES IN CHILDREN 0-13 YEARS  
IN KILIFI DSS - November 2005

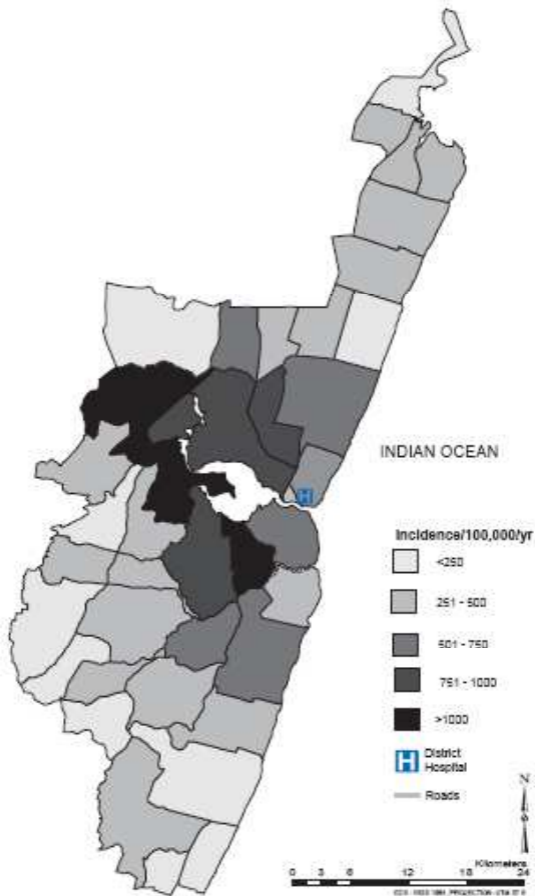

Supplement: MOESM3 [file 9477560]
